# Supplementary material
Source: PubMed Central journal article supplement (PMC4407252)
Supplement: mmc1.pdf [file mmc1.pdf]

**Biophysical Journal**

**Supporting Material**

**Optogenetic versus Electrical Stimulation of Human Cardiomyocytes:  
Modeling Insights**

John C. Williams<sup>1,2</sup> and Emilia Entcheva<sup>1,3,\*</sup>

<sup>1</sup>Department of Biomedical Engineering, <sup>2</sup>Department of Electrical and Computer Engineering,  
and <sup>3</sup>Institute for Molecular Cardiology, Stony Brook University, Stony Brook, New York

# Supporting Figures

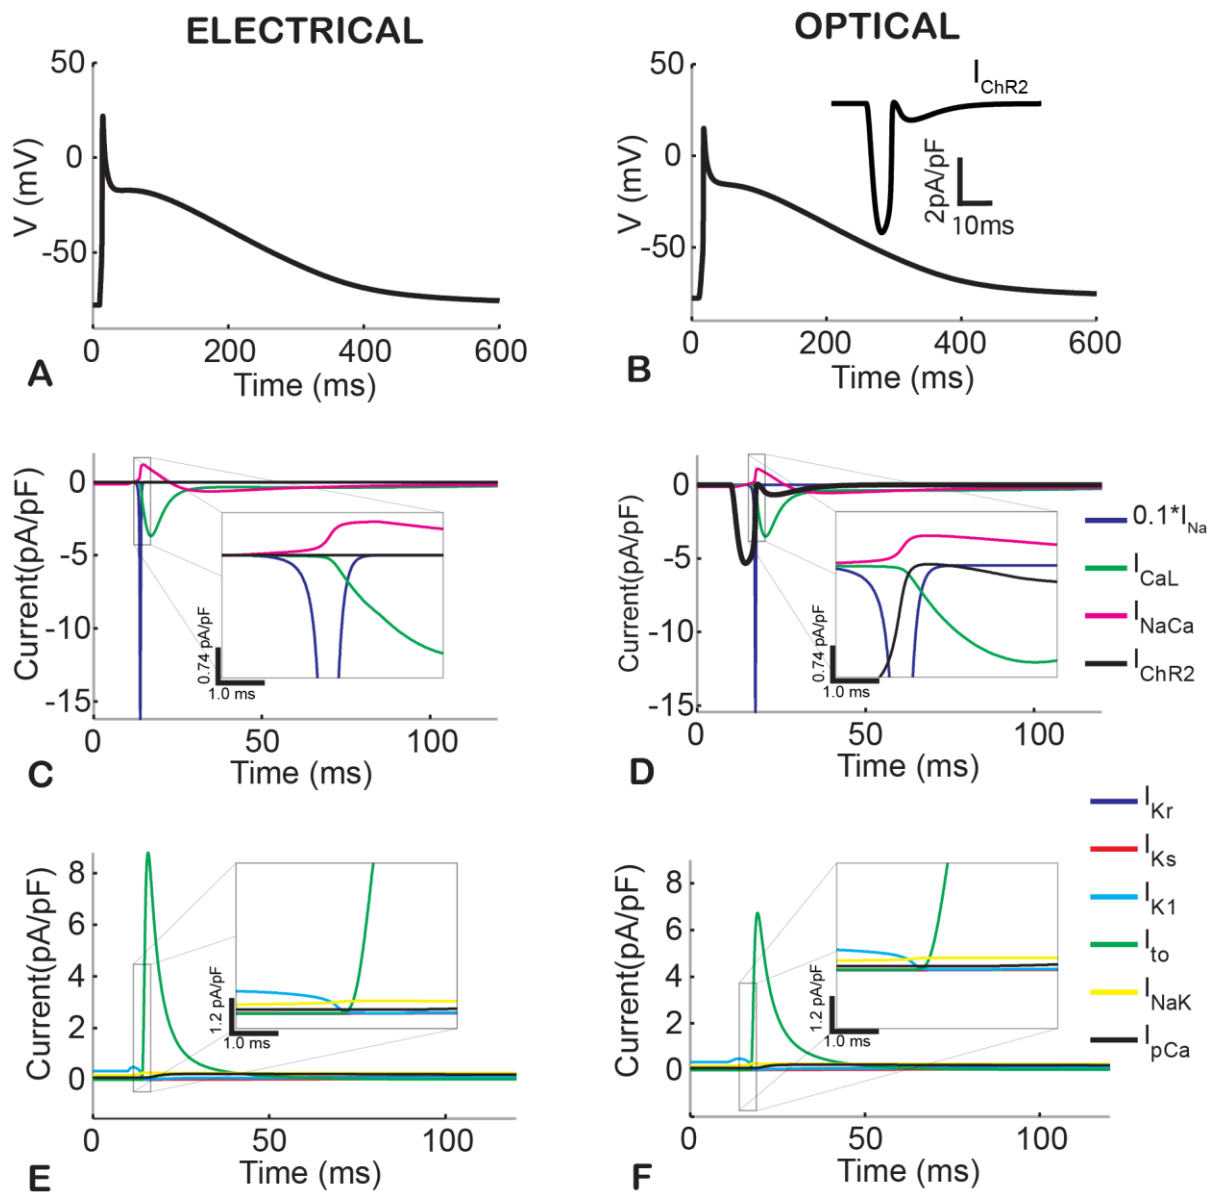

**Figure S1. Electrical (left) and optical (right) stimulation produce similar action potential morphology in human atrial cardiomyocytes (the Courtemanche model).** **A-B.** Triggered action potentials by injection of electrical current (5 ms, 8 pA/pF) and an optical pulse (10 ms, 0.5 mW/mm<sup>2</sup>, 470nm), respectively. Inset in **B** shows the time course of the resultant ChR2 current. **C-D.** Underlying major inward currents and  $I_{NaCa}$  during electrical and optical stimulation, respectively. **E-F.** Underlying outward currents during electrical (**E**) and optical stimulation (**F**). Insets are zoomed-in versions of the area of interest in **C-F**.

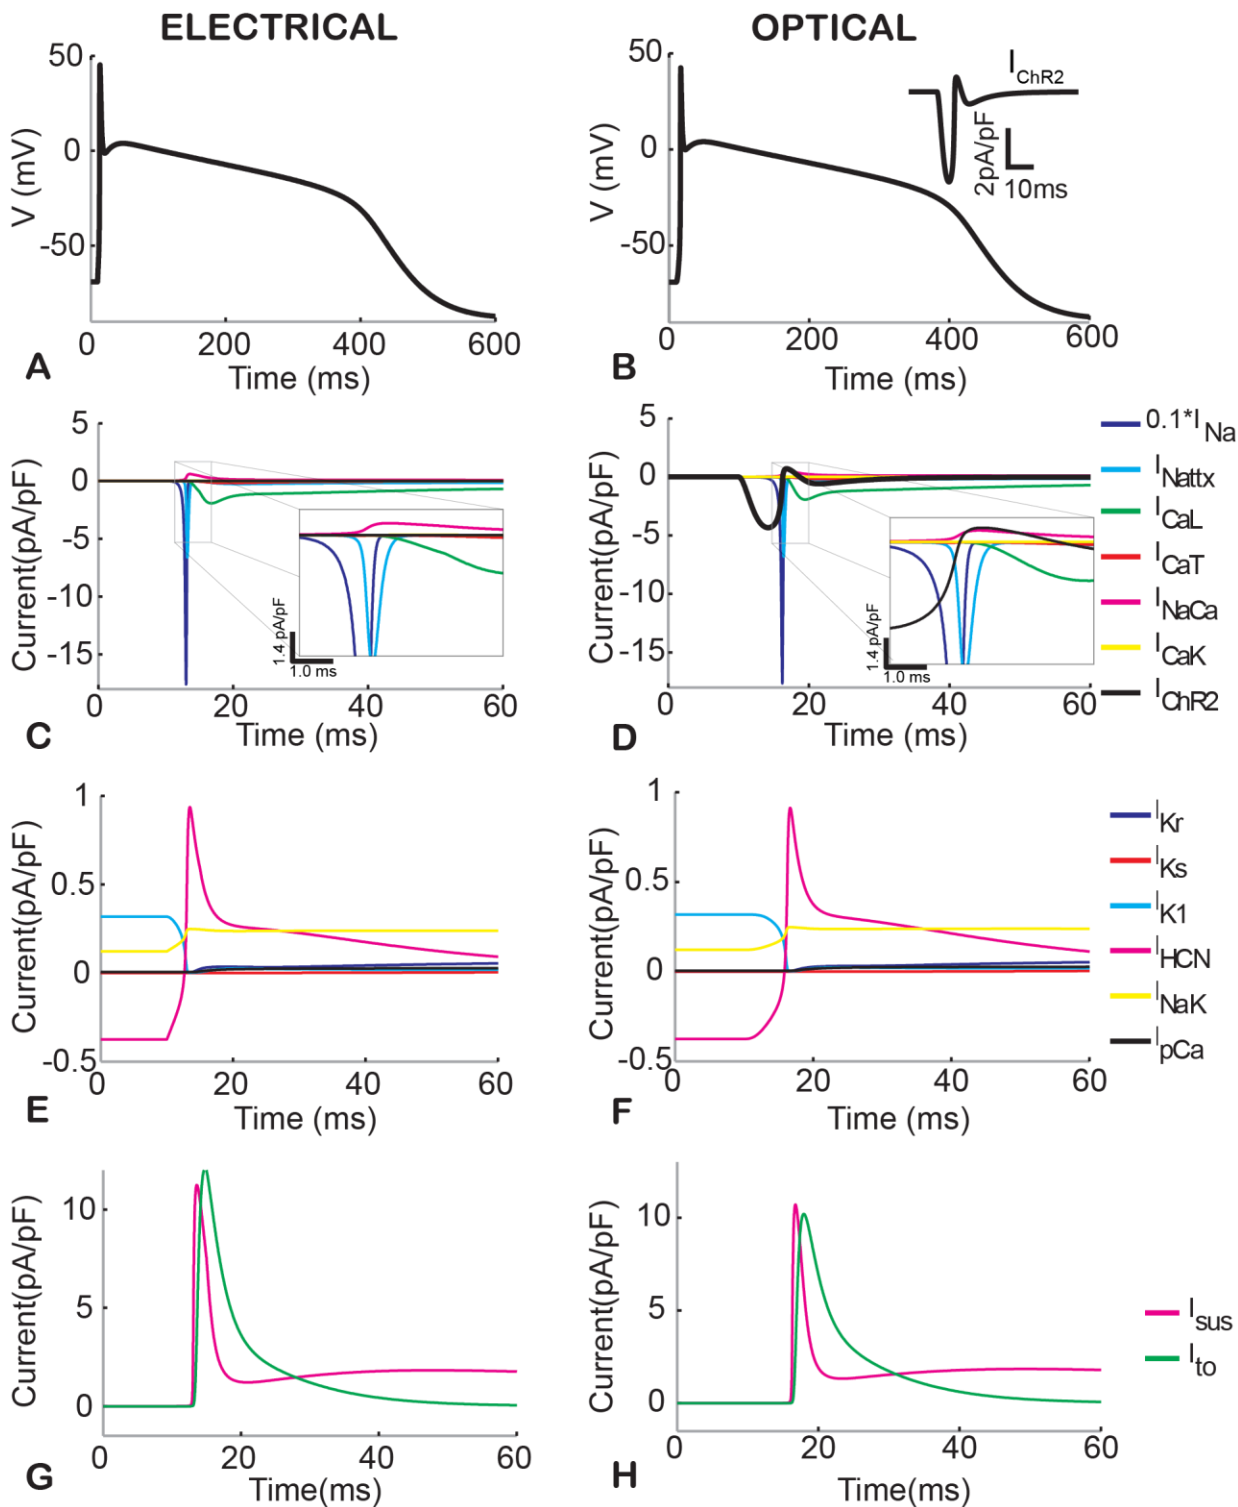

**Figure S2. Electrical (left) and optical (right) stimulation produce similar action potential morphology in human Purkinje cardiomyocytes (the Sampson model).** A-B. Triggered action potentials by injection of electrical current (5 ms, 8 pA/pF) and by an optical pulse (10 ms, 0.5 mW/mm<sup>2</sup>, 470 nm), respectively. Inset in B shows the time course of the resultant ChR2 current. C-H. Underlying major inward and outward currents during electrical and optical stimulation, respectively. Insets are zoomed-in versions of the area of interest in C-D.

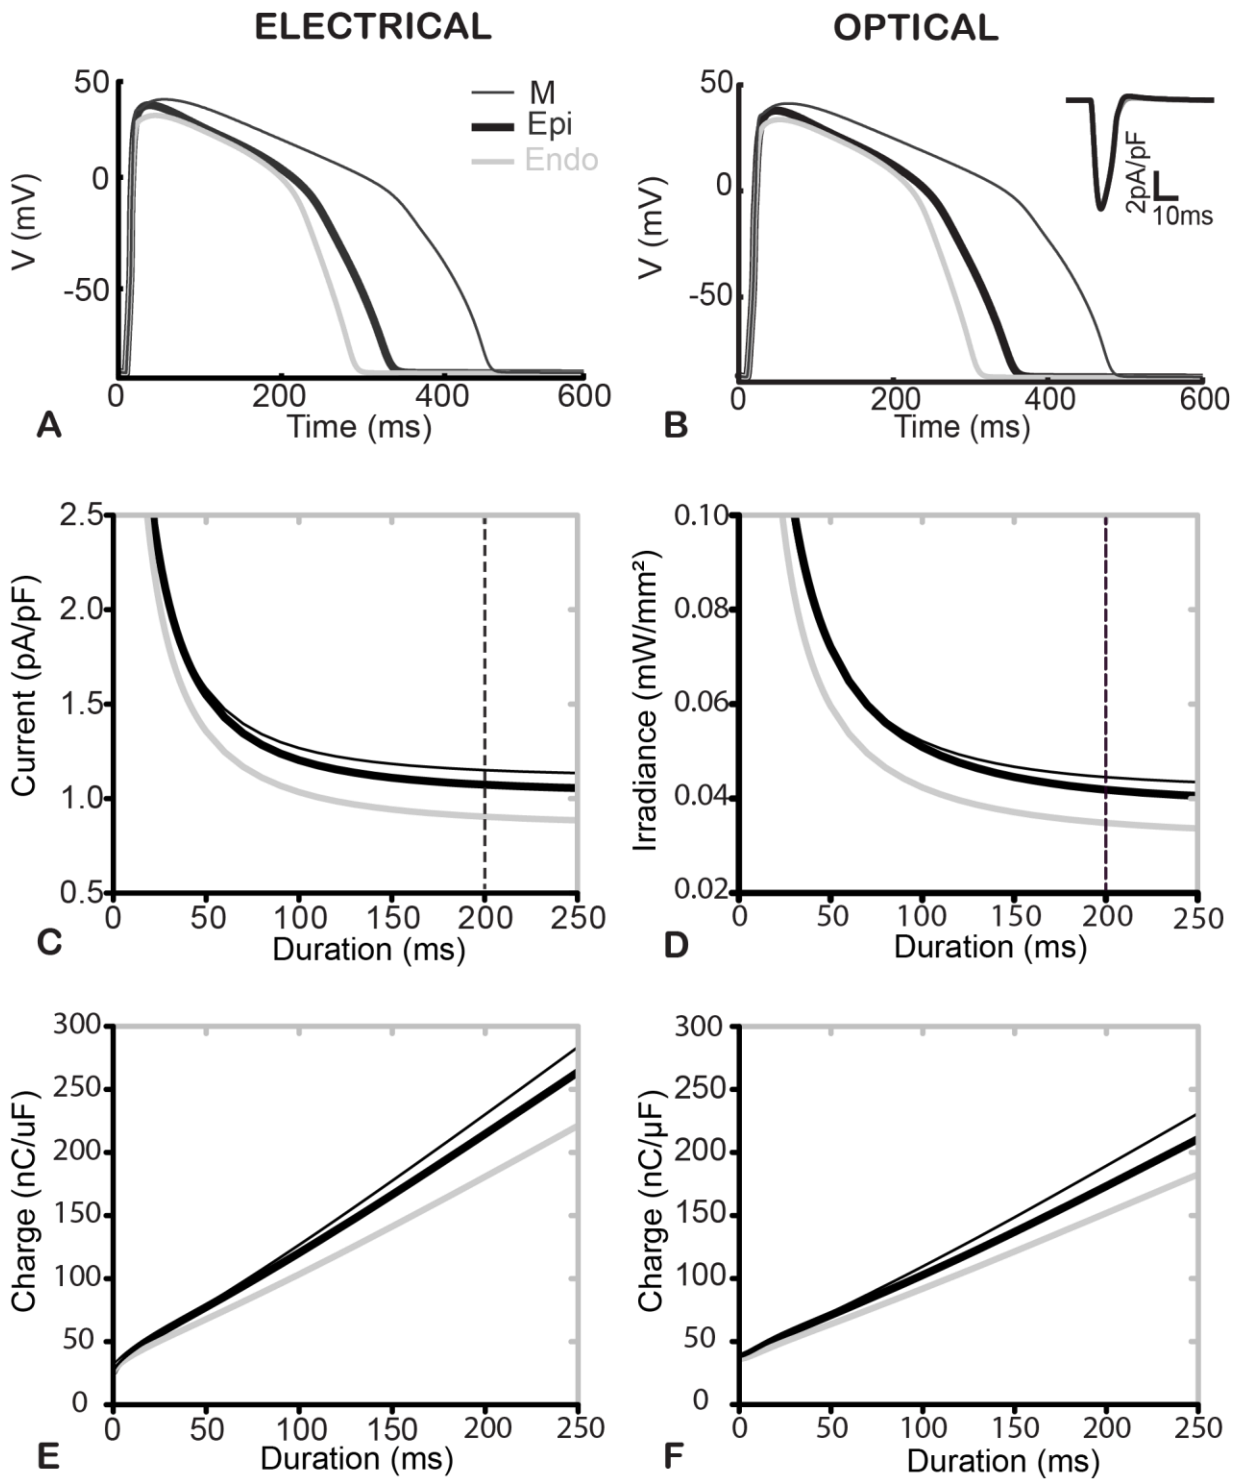

**Figure S3. Differential transmural cell response to electrical (left) and optical (right) stimulation and related strength-duration and charge curves in the O'Hara epicardial (Epi), endocardial (Endo), and mid-myocardial (M) ventricular cell. A.** Electrically-triggered action potentials in by direct current injection (5 ms, 8 pA/pF). **B.** Optically-triggered action potentials by a light pulse (10 ms, 0.5 mW/mm<sup>2</sup>, 470 nm). Dashed vertical line denotes approximate rheobase (200 ms). **C-D.** Strength-duration curves. **E-F.** Minimum stimulus charge needed to excite.

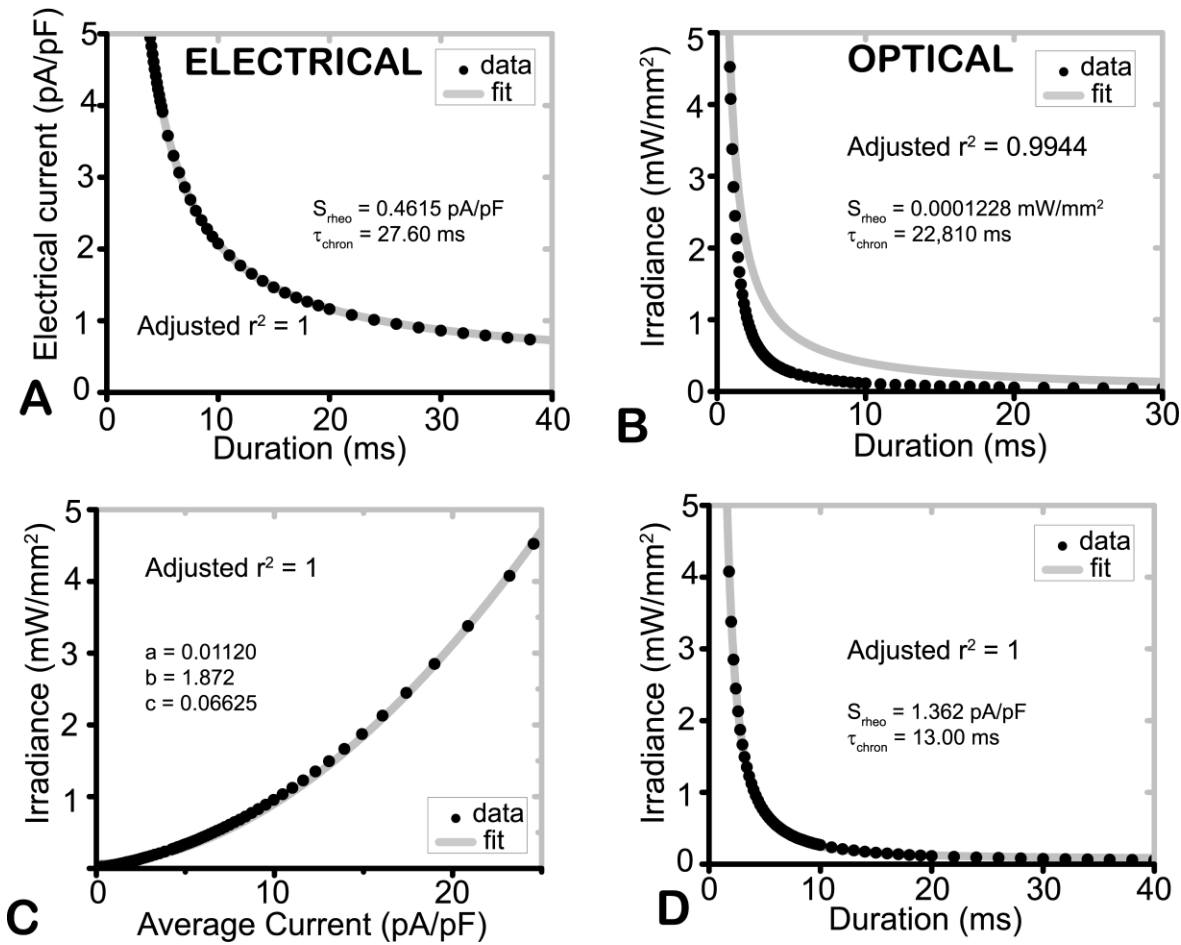

**Figure S4. Optogenetic stimulation produces a correctable change in strength-duration curve shape in human atrial cardiomyocytes.** **A.** Electrical SD curves in human atrial cardiomyocytes fit well a theoretical mono-exponential relationship assuming simple equivalent RC-circuit behavior. **B.** Optical SD curves (using irradiance) deviate from the theoretical mono-exponential curve. **C.** Empirical mapping of irradiance to the average inward stimulating current, using a power series model. **D.** Corrected optical SD curve according to Eq. 14 (correction using the mapping in C) fits the theoretical mono-exponential relationship for irradiance vs. pulse duration.

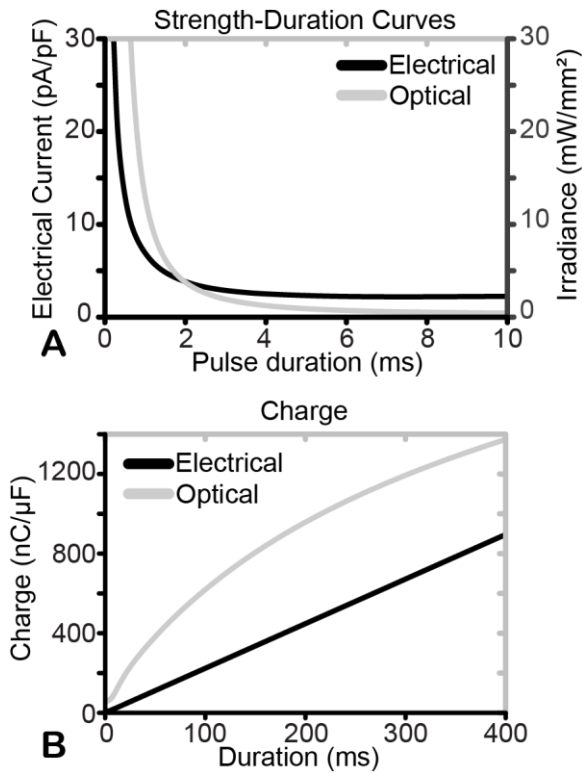

**Figure S5. Neuronal response differs from cardiac: optical and electrical strength-duration and charge curves in a modified Hodgkin-Huxley giant squid axon model. A.** SD curves for electrical stimulation by direct current injection and for optical stimulation by a light pulse (470 nm). **B.** Minimum charge needed to excite (nC/μF).

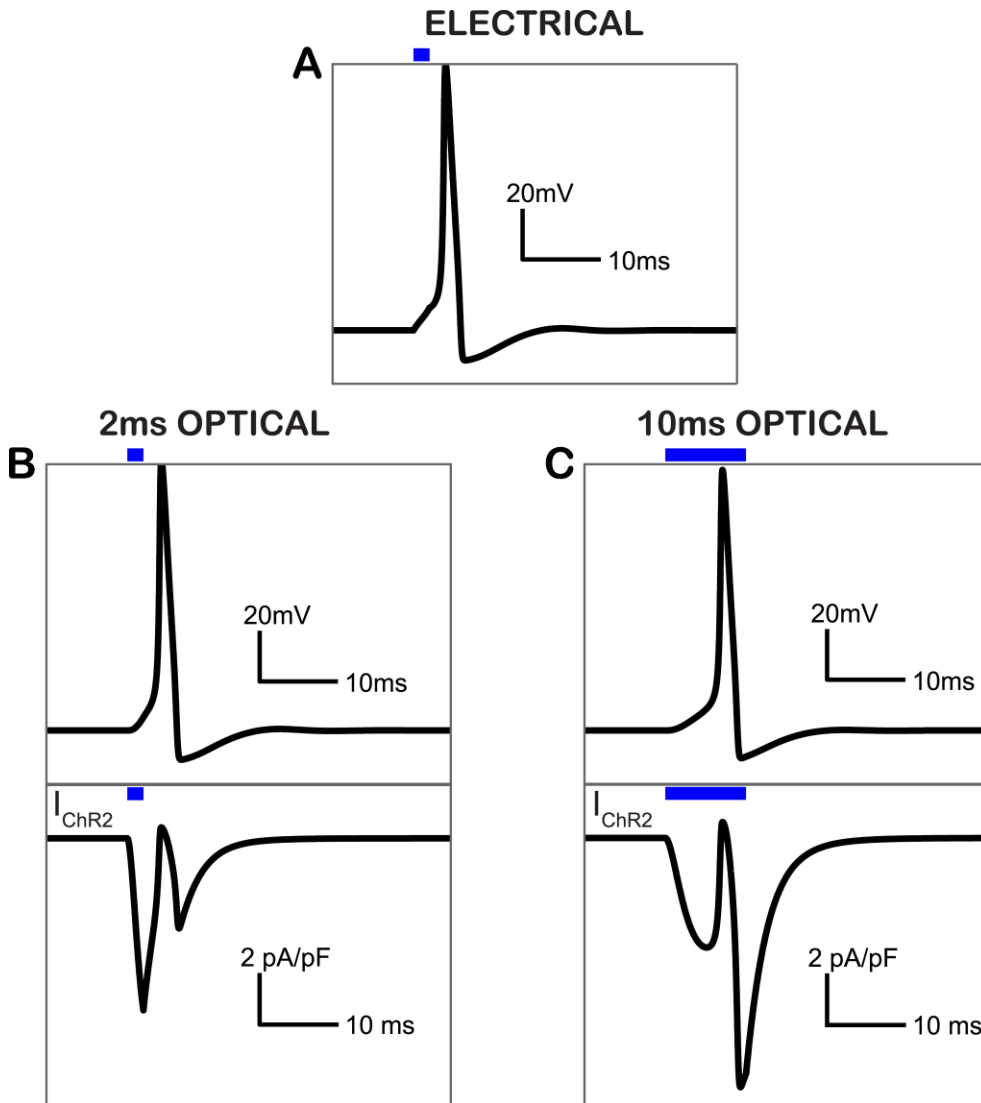

**Figure S6. Transmembrane voltage (left) and ChR2 current (right) during an action potential in a modified Hodgkin-Huxley squid axon model.** Blue bars show period of electrical (A) and optical (B-C) stimulus. **A.** Action potential from 2 ms, 5 pA/pF rectangular electrical pulse. **B-C.** Action potential and corresponding ChR2 current from 2 ms 2 mW/mm<sup>2</sup> and 10 ms 0.5 mW/mm<sup>2</sup> 470nm light pulse, respectively. Simulations were done at 6 °C.
